# Supplementary material
Source: PubMed Central journal article supplement (PMC9972241)
Supplement: jamainternmed-e227170-s003.pdf [file jamainternmed-e227170-s003.pdf]

## Data Sharing Statement

Richter. The Effects of Opt-out vs Opt-in Tobacco Treatment on Engagement, Cessation, and Costs. *JAMA Intern Med.* Published February 27, 2023. doi:10.1001/jamainternmed.2022.7170

### Data

**Data available:** Yes

**Data types:** Deidentified participant data, Data dictionary

**How to access data:** Please send data requests to: [krichter@kumc.edu](mailto:krichter@kumc.edu)

**When available:** With publication

### Supporting Documents

**Document types:** Statistical/analytic code, Informed consent form

**How to access documents:** Please send requests for Statistical/analytic code to [bgajewski@kumc.edu](mailto:bgajewski@kumc.edu) Please send requests for consent form to [krichter@kumc.edu](mailto:krichter@kumc.edu)

**When available:** With publication

### Additional Information

**Who can access the data:** The data will be made available to anyone requesting the data

**Types of analyses:** For any purpose

**Mechanisms of data availability:** with a mutually-agreed upon level of support from study investigator(s)
